# Supplementary material for: Age and Social Context Modulate the Effect of Anxiety on Risk-taking in Pediatric Samples
Source: Springer Nature journal article supplement (doi:10.1007/s10802-015-0098-4), 2015-12-11
Supplement: MOESM1 [file 6641826]

**Fig. S1a.** Post-study questionnaire

Instructions:You just played a game where a man jumped over a different number of buses. Please rate how you feel about each of the jumps below using this 1-10 scale:

**1 2 3 4 5 6 7 8 9 10**

Very Not Positive or Very

Negative Negative Positive


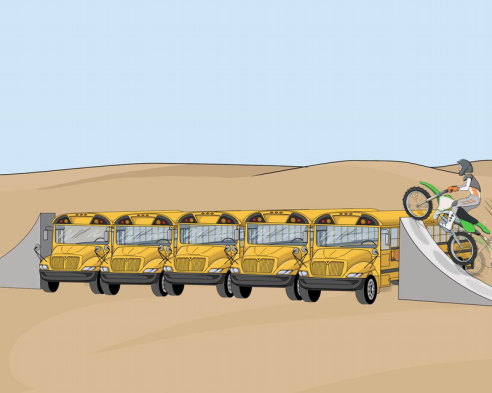


5.

1.


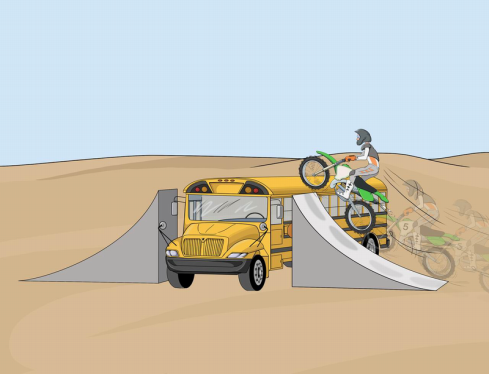


6.

2.


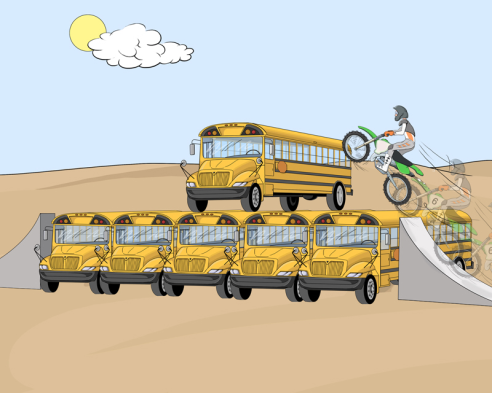


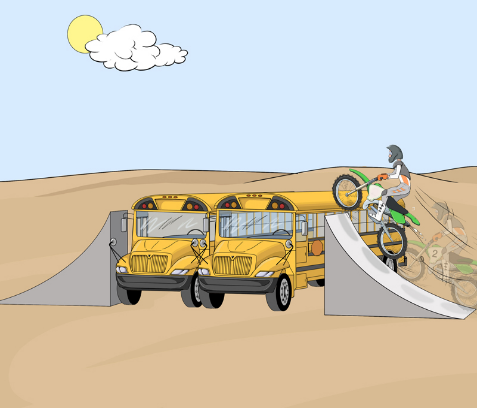


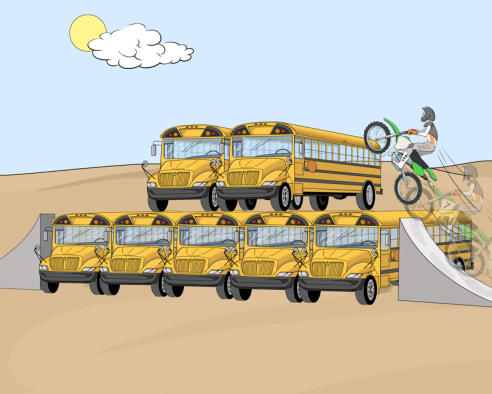

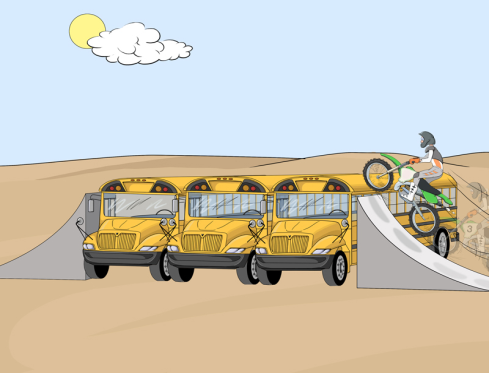


7.

3.

8.

4.


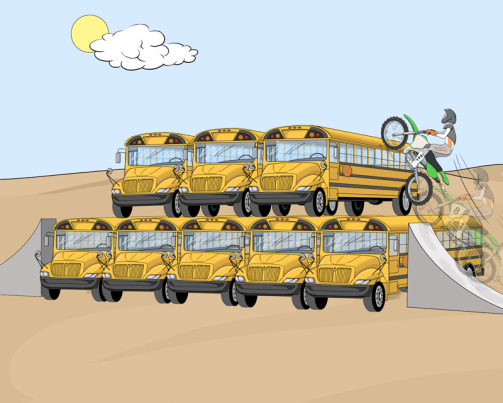

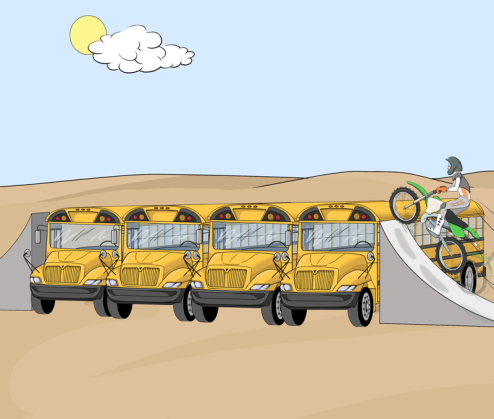


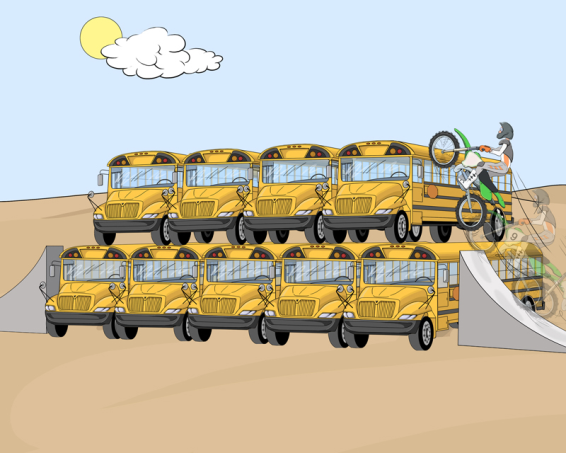


9.

**Fig. S1b.** Post-study questionnaire

Instructions:Which two types of jumps were the hardest for you to decide to bet or pass? Please circle the two jump numbers:

**1 2 3 4 5 6 7 8 9**

**Fig. S1c.** Post-study questionnaire

Instructions:The following questions will ask you to think about your experience playing the game with the cyclist. Please answer the questions using this 1-10 scale:

**1 2 3 4 5 6 7 8 9 10**

Not at all Somewhat Very Much

| **Answer the following questions about your peers who were observing your performance.** | | | | |
| --- | --- | --- | --- | --- |
|  | | | **Rating** |  |
| 1. | How competitive do you think the kids are? |  |  |  |
| 2. | How critical do you think the kids are? |  |  |  |
| 3. | How critical do you think the kids were of your performance? |  |  |  |
