# Supplementary material for: Age and Social Context Modulate the Effect of Anxiety on Risk-taking in Pediatric Samples
Source: Springer Nature journal article supplement (doi:10.1007/s10802-015-0098-4), 2015-12-11
Supplement: MOESM2 [file 6641826]

**Supplementary Fig.** **S2**. Mean self-report ratings on how subject’s felt as a function of risk-level. Subjects indicated how they felt about each of the jumps on a 1-10 Likert scale (1 = *very negative*, 5.5 = *not positive or negative*, 10 = *very positive*). * indicates that the rating is significantly different from 5.5 (*p* < .01), error bars represent ± SEM


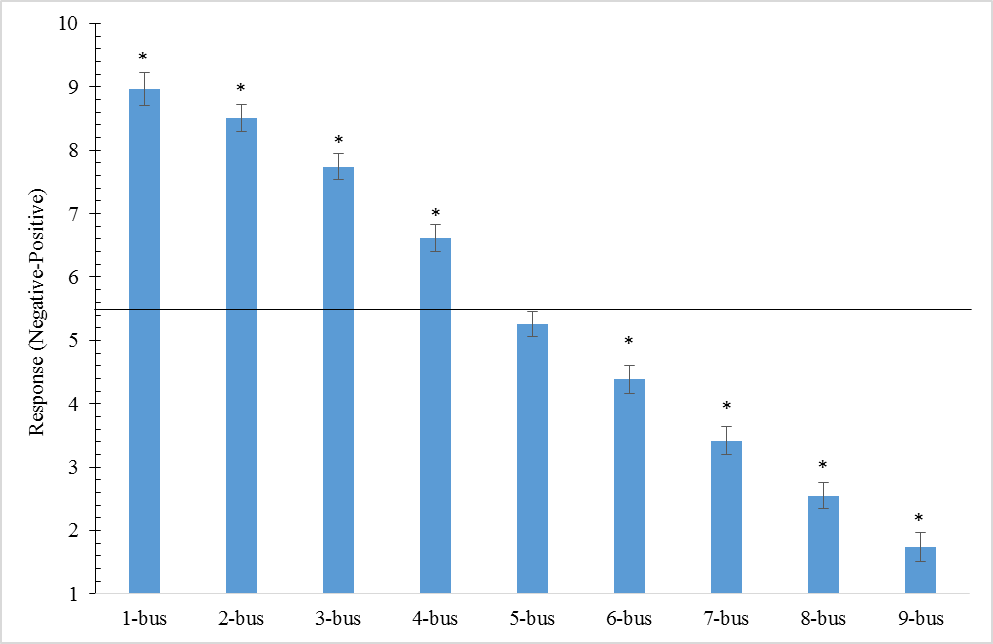


*
